# Supplementary figures and images for: Genome-wide distribution of genetic diversity and linkage disequilibrium in a mass-selected population of maritime pine
Source: Springer Nature journal article supplement (doi:10.1186/1471-2164-15-171), 2014-01-01

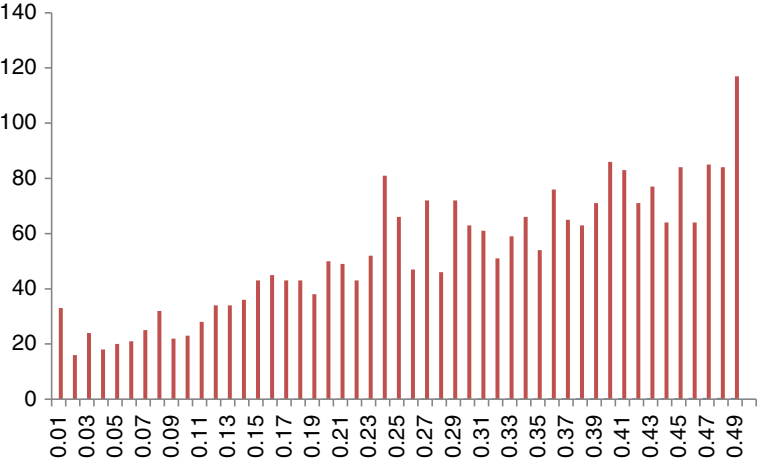

Supplement: 12864_2013_5796_MOESM18_ESM.pdf [file 12864_2013_5796_MOESM18_ESM.pdf]
